# Supplementary material for: Xylan alleviates dietary fiber deprivation-induced dysbiosis by selectively promoting Bifidobacterium pseudocatenulatum in pigs
Source: PubMed Central journal article supplement (PMC8606072; doi:10.1186/s40168-021-01175-x), 2021-11-21

**A**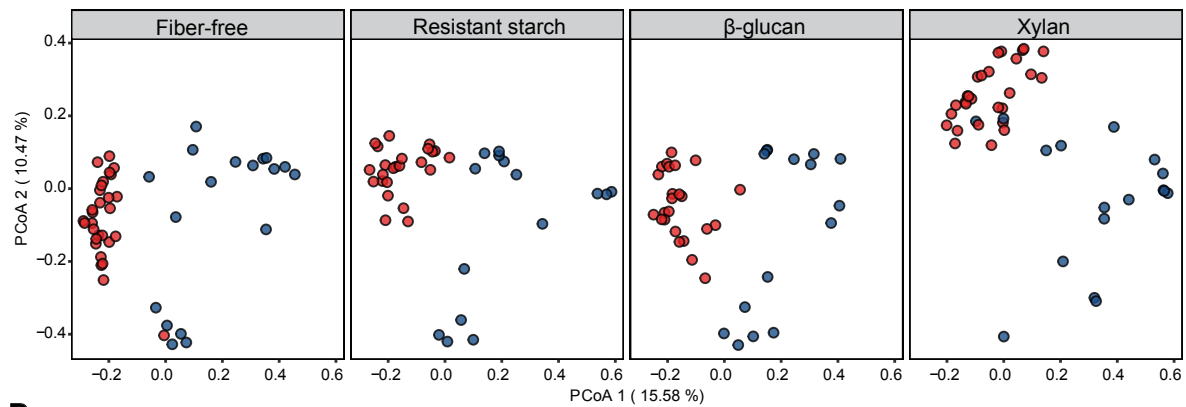**B**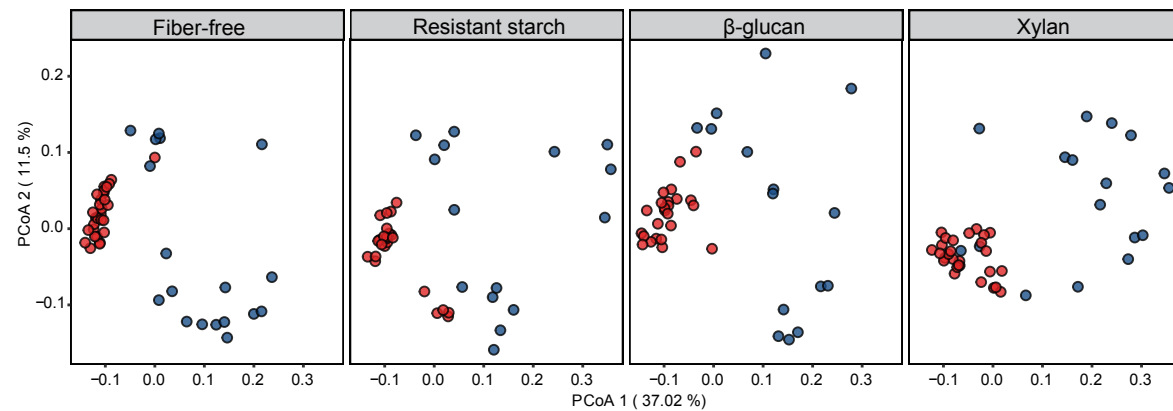

Supplement: 40168_2021_1175_MOESM8_ESM.pdf [file 40168_2021_1175_MOESM8_ESM.pdf]
